# Supplementary material
Source: publisher figshare collection journal article supplement (https://acs.figshare.com/ndownloader/files/25659642)
Supplement: Supplementary file 1 [file 25659642]

## **Visualization of autophagy progression by Red-Green-Blue autophagy sensor**

Heejung Kim<sup>1,2</sup>, Hyunbin Kim<sup>1,3</sup>, Jaesik Choi<sup>4</sup>, Kyung-Soo Inn<sup>2\*</sup> and Jihye Seong<sup>1-3\*</sup>

<sup>1</sup>Convergence Research Center for Diagnosis Treatment Care of Dementia, Brain Science Institute, Korea Institute of Science and Technology (KIST), Seoul, South Korea

<sup>2</sup>Department of Converging Science and Technology, Kyung Hee University, Seoul, South Korea

<sup>3</sup>Division of Bio-Medical Science & Technology, KIST School, Korea University of Science and Technology, Seoul, South Korea

<sup>4</sup>Graduate School of Artificial Intelligence, Korea Advanced Institute of Science and Technology (KAIST), Daejeon, Republic of Korea

| Name        | $\lambda_{\text{ex}}$ | $\lambda_{\text{em}}$ | Stokes | EC     | QY   | Brightness | pKa | Aggregation |
|-------------|-----------------------|-----------------------|--------|--------|------|------------|-----|-------------|
| Sirius      | 355                   | 424                   | 69     | 15,000 | 0.24 | 3.6        | 3   | m           |
| mTagBFP2    | 399                   | 454                   | 55     | 50,600 | 0.64 | 32.38      | 2.7 | m           |
| mTagBFP     | 402                   | 457                   | 55     | 52,000 | 0.63 | 32.76      | 2.7 | m           |
| mBlueberry2 | 402                   | 467                   | 65     | 51,000 | 0.48 | 24.48      | 2.5 | m           |
| mTurquoise2 | 434                   | 474                   | 40     | 30,000 | 0.93 | 27.9       | 3.1 | m           |
| SCFP2       | 434                   | 474                   | 40     | 29,000 | 0.41 | 11.89      | 3.5 | m           |
| Aquamarine  | 430                   | 474                   | 44     | 26,000 | 0.89 | 23.14      | 3.3 | m           |
| mCerulean3  | 433                   | 475                   | 42     | 40,000 | 0.87 | 34.8       | 3.2 | m           |
| SCFP1       | 434                   | 477                   | 43     | 29,000 | 0.24 | 6.96       | 3.5 | m           |

**Figure S1. *In vitro* characterization of various fluorescent proteins**

Physicochemical properties of different blue fluorescent proteins: spectral profiles, extinction coefficient (EC), quantum yield (QY), brightness, pKa and aggregation. The information was achieved from FPbase <sup>1</sup>.

| Name            | $\lambda_{\text{ex}}$ | $\lambda_{\text{em}}$ | Stokes | EC     | QY   | Brightness | pKa | Aggregation |
|-----------------|-----------------------|-----------------------|--------|--------|------|------------|-----|-------------|
| mOrange         | 548                   | 562                   | 14     | 71,000 | 0.69 | 48.99      | 6.5 | m           |
| mOrange2        | 549                   | 565                   | 16     | 58,000 | 0.6  | 34.8       | 6.5 | m           |
| mApple          | 568                   | 592                   | 24     | 75,000 | 0.49 | 36.75      | 6.5 | m           |
| PAmCherry1 (On) | 564                   | 595                   | 31     | 18,000 | 0.46 | 8.28       | 6.3 | m           |
| PAmCherry2 (On) | 570                   | 596                   | 26     | 24,000 | 0.53 | 12.72      | 6.2 | m           |
| PAmCherry3 (On) | 570                   | 596                   | 26     | 21,000 | 0.24 | 5.04       | 6.2 | m           |
| mGinger2        | 578                   | 631                   | 53     | 36,000 | 0.04 | 1.44       | 6.5 | m           |
| mKate           | 588                   | 635                   | 47     | 45,000 | 0.33 | 14.85      | 6.2 | m           |
| mGrape2         | 605                   | 636                   | 31     | 33,000 | 0.03 | 0.99       | 6.3 | m           |
| mRouge          | 600                   | 637                   | 37     | 43,000 | 0.02 | 0.86       | 6.1 | m           |
| mNeptune2.5     | 599                   | 643                   | 44     | 95,000 | 0.24 | 22.8       | 5.8 | m           |
| Neptune         | 600                   | 650                   | 50     | 72,000 | 0.18 | 12.96      | 5.8 | d           |
| mNeptune2       | 599                   | 651                   | 52     | 89,000 | 0.24 | 21.36      | 6.3 | m           |
| mMaroon1        | 609                   | 657                   | 48     | 80,000 | 0.11 | 8.8        | 6.2 | m           |
| mNeptune684     | 604                   | 684                   | 80     | 39,000 | 0.03 | 1.17       | 6.5 | m           |

**Figure S2. *In vitro* characterization of various fluorescent proteins**

Physicochemical properties of orange to far-red fluorescent proteins: spectral profiles, extinction coefficient (EC), quantum yield (QY), brightness, pKa and aggregation. The information was achieved from FPbase <sup>1</sup>.

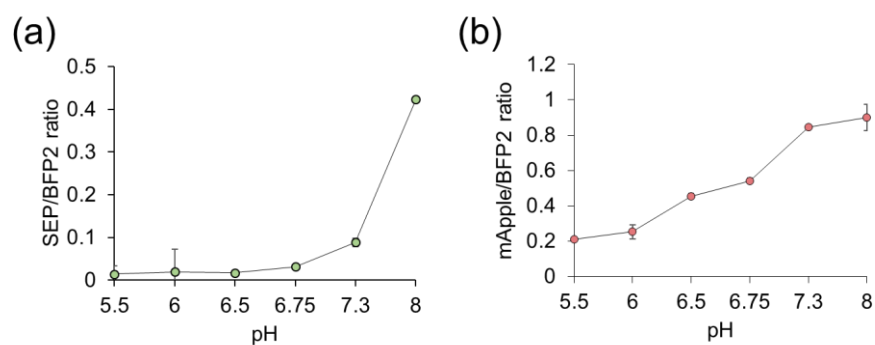

**Figure S3. Different pH sensitivity of SEP and mApple of RGB-LC3 in HEK293A cells.**

(a-b) The intensity ratios of SEP/mTagBFP2 (a) and mApple/mTagBFP2 (b) of RGB-LC3 sensor expressed in HEK cells under different pH conditions. The representative images were shown in Figure 3c. Data indicate the mean value  $\pm$  s.d. (n=10).

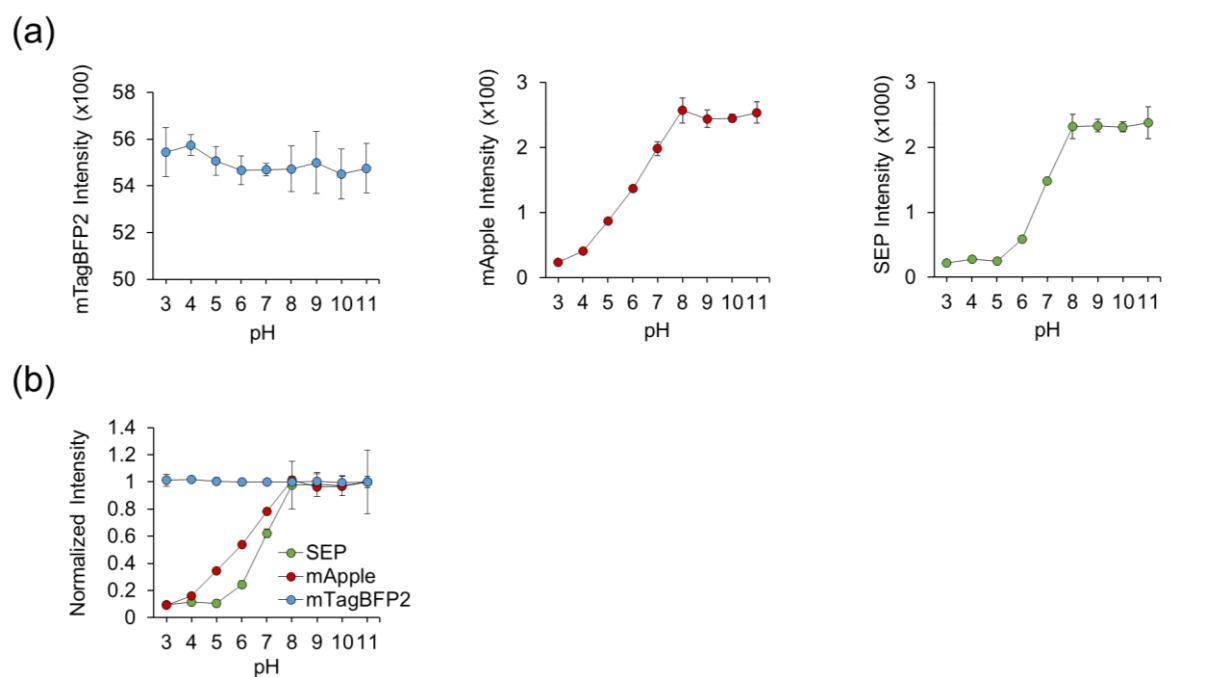

**Figure S4. The pH titration curves of mTagBFP2, mApple and SEP of the purified RGB-LC3.**

(a) The pH titration curves for the fluorescent intensity of mTagBFP2 (n=5), mApple (n=5), and SEP (n=5) in the purified full length RGB-LC3. (b) The merged graph displaying different pH sensitivities of mTagBFP2, mApple and SEP. Data indicate the mean value  $\pm$  s.e.m.

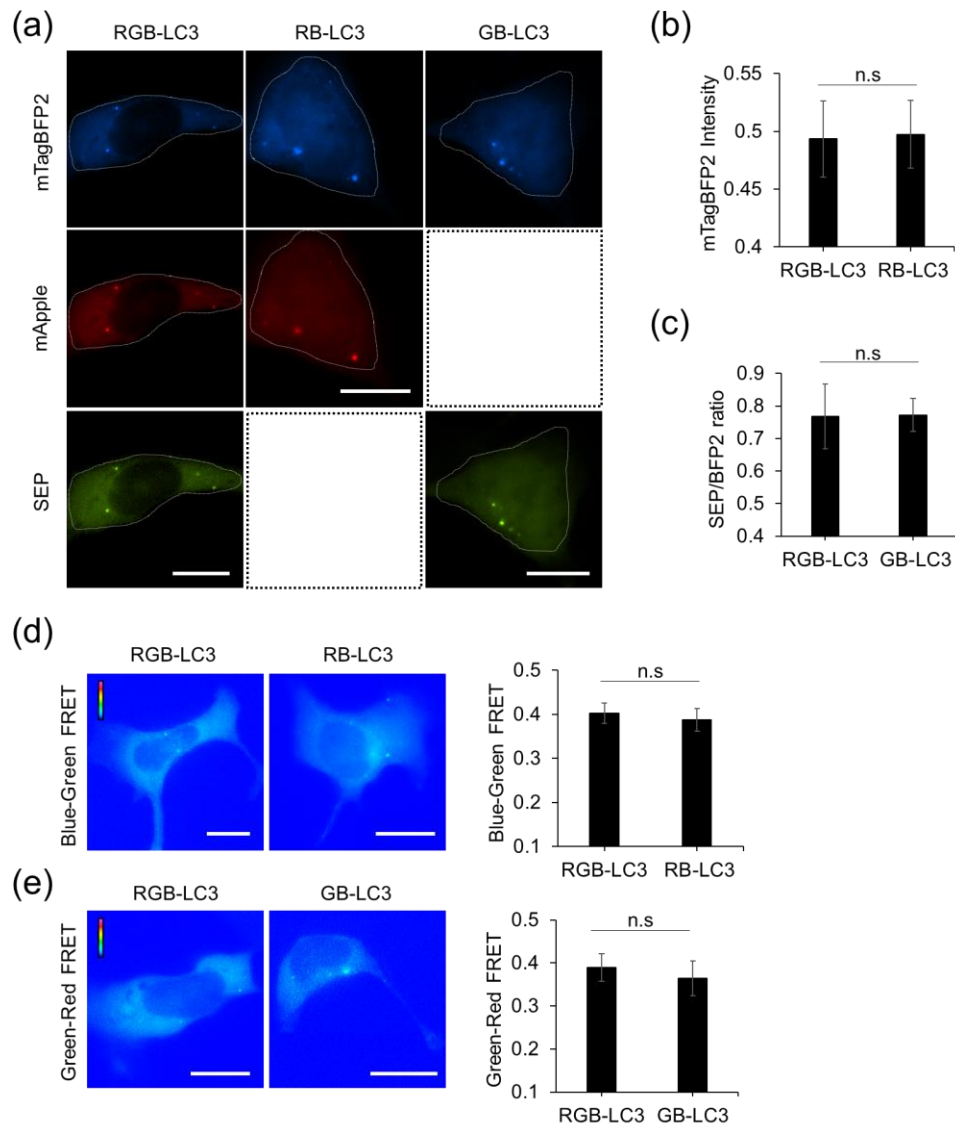

**Figure S5. No FRET was detected between the FPs of RGB-LC3 in phagophores of HEK293A cells.**

(a-c) Representative images of mTagBFP2, mApple and SEP in the HEK293A cells expressing RGB-LC3, RB-LC3 or GB-LC3 after the treatment with 200 nM rapamycin and 50  $\mu$ M 3-MA for 6 hours (a). Scale bar, 20  $\mu$ m. No difference was observed in (b) the mTagBFP2 intensity in the phagophores of the cells expressing RGB-LC3 and RB-LC3, and (c) the SEP/mTagBFP2 ratio in the phagophores of the cells expressing RGB-LC3 and GB-LC3. Data indicate the mean value  $\pm$  s.e.m. (N=10). (d-e) Representative images of Green-Red FRET (excitation filter 482DF40, emission filter 641DF40) in the cells expressing RGB-LC3 or RB-LC3 (d) and Blue-Green FRET (excitation filter 377DF40, emission filter 536DF40) in the cells expressing RGB-LC3 or GB-LC3 (e) after the treatment with 200 nM rapamycin and 50  $\mu$ M 3-MA for 6 hours

(a). Scale bar, 20  $\mu\text{m}$ . No difference was observed in (d) the Green-Red FRET level in the phagophores of the cells expressing RGB-LC3 and RB-LC3, and (e) the Blue-Green FRET level in the phagophores of the cells expressing RGB-LC3 and GB-LC3. Data indicate the mean value  $\pm$  s.e.m. (N=10).

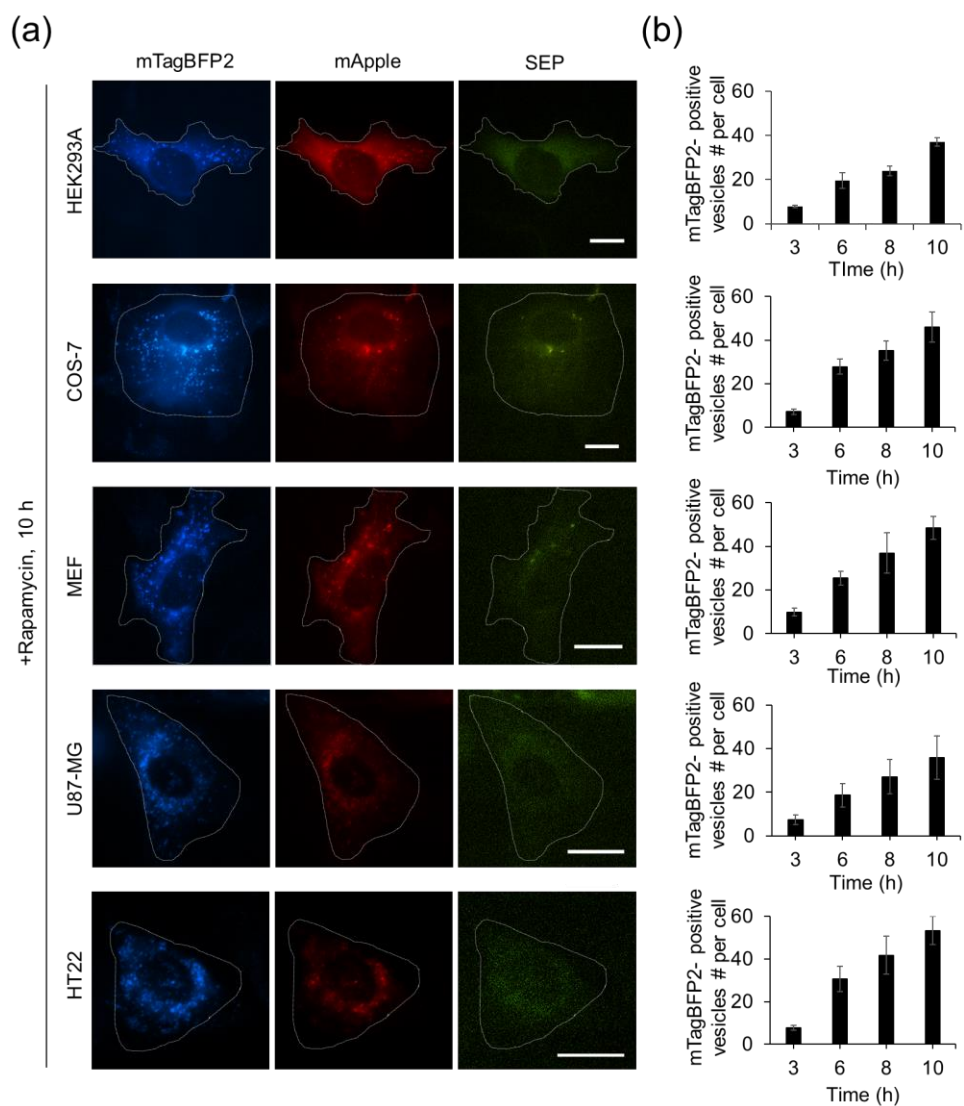

**Figure S6. RGB-LC3 can monitor the autophagy progression in different cell types.**

(a) Representative images of mTagBFP2, mApple and SEP of RGB-LC3 expressed in the indicated cell lines after the treatment of 200 nM rapamycin for 10 hours. Scale bars, 20  $\mu$ m.

(b) Total numbers of mTagBFP2-positive vesicles per cell in different cell lines after the treatment of rapamycin for indicated times. Data indicate the mean values  $\pm$  s.e.m. (N=10 cells).



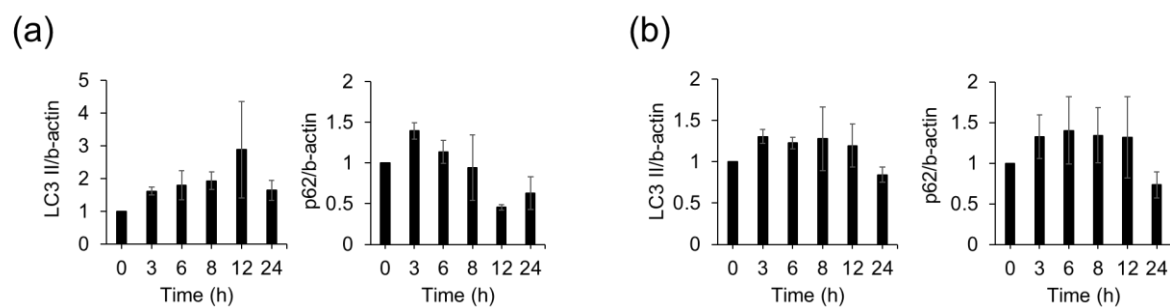

**Figure S7. The RGB-LC3 sensor does not interfere endogenous autophagic flux**

**(a-b)** The expression levels of LC3-I, II and p62 in HEK293A cells without **(a)** or with the expression of RGB-LC3 sensor **(b)** after the treatment of 200 nM rapamycin at indicated times. The relative levels of LC3-II and p62 normalized by  $\beta$ -actin were displayed (n=3).

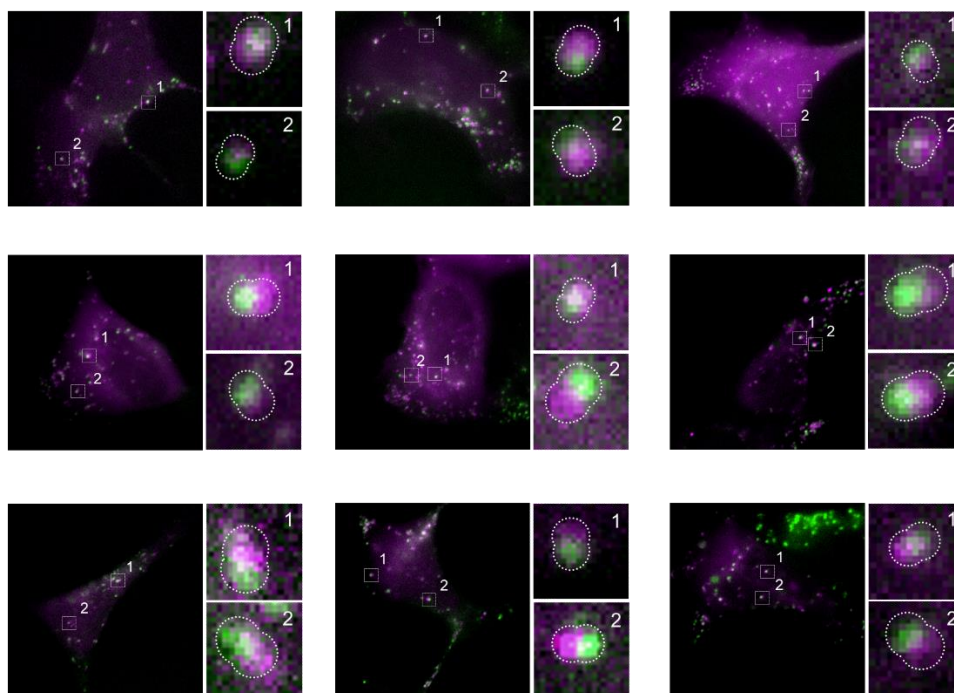

**Figure S8. The fusion stage of autophagosomes and lysosomes.** The HEK293A cells expressing RB-LC3 and LysoTracker (50 nM) were treated with 200 nM rapamycin for 8 hours. The mTagBFP2-positive autophagic vesicles (magenta) in contact with LysoTracker (green) of the boxes in left panels were displayed with a high magnification in the right panels.

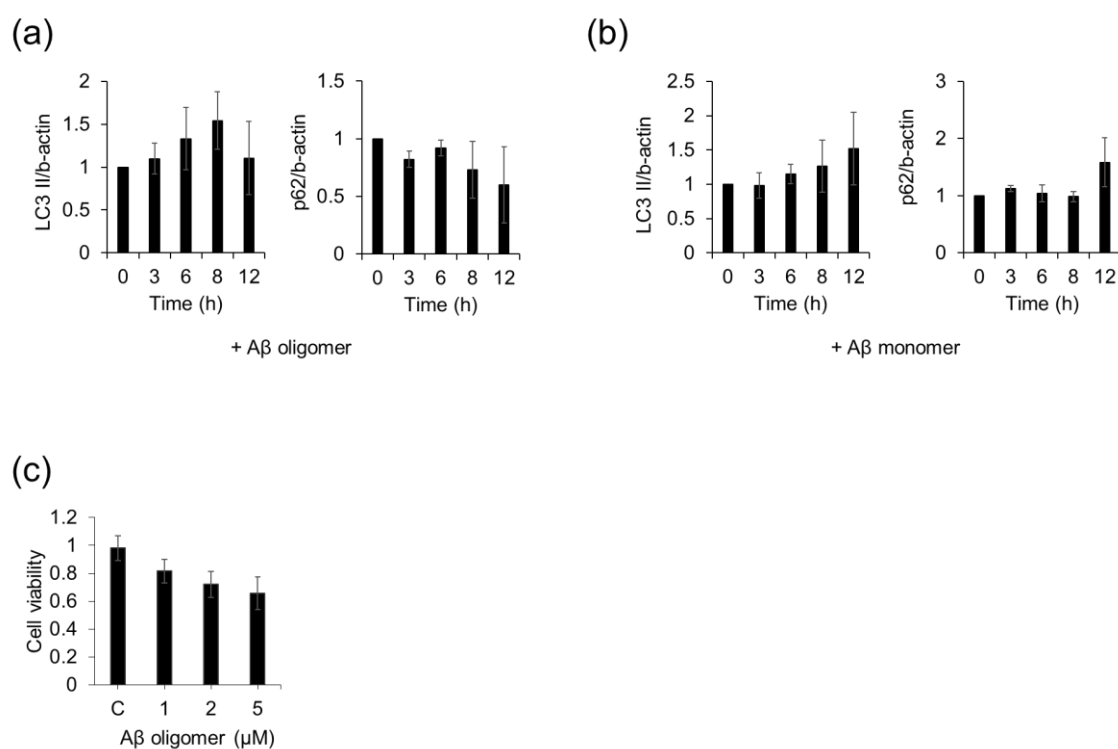

**Figure S9. Different effects of Aβ monomer and oligomer on autophagy flux.**

**(a-b)** The western blot results in Fig. 6F-G were quantified. The relative levels of LC3-II and p62 were normalized by β-actin in HT22 cells after the treatment of oligomeric Aβ **(a)** or monomeric Aβ **(b)** for indicated times (n=3). **(c)** The viability of the HT22 cells treated by different concentrations of oligomeric Aβ for 24 hr.

## Reference

- (1) Lambert, T. J. FPbase: a community-editable fluorescent protein database. *Nat Methods* **2019**, *16* (4), 277-278, DOI: 10.1038/s41592-019-0352-8.
